# Supplementary material
Source: PubMed Central journal article supplement (PMC7857646)
Supplement: web_material_kwaa097.pdf [file web_material_kwaa097.pdf]

## Web Material

### Dietary Fat Intake and Risk of Uterine Leiomyomata: A Prospective Ultrasound Study

Theodore M. Brasky\*, Traci N. Bethea, Amelia K. Wesselink, Ganesa R. Wegienka, Donna D. Baird,  
Lauren A. Wise

Web Tables 1 & 2

---

Web Table 1. Selected Characteristics of SELF Participants by Follow-up Status, 2010-2018.

| Characteristic                               | Withdrawal <sup>a</sup>         |          |                                |        | Remaining cohort<br>n=1,105 |        |
|----------------------------------------------|---------------------------------|----------|--------------------------------|--------|-----------------------------|--------|
|                                              | Before first<br>follow-up, n=60 |          | After first<br>follow-up, n=66 |        | Mean                        | SD     |
|                                              | Mean                            | SD       | Mean                           | SD     |                             |        |
| Age, years                                   | 28.40                           | 3.74     | 28.03                          | 3.41   | 28.45                       | 3.46   |
| Body mass index, kg/m <sup>2</sup>           | 33.20                           | 9.94     | 33.49                          | 10.59  | 33.75                       | 9.75   |
| Number of live births                        | 1.43                            | 1.52     | 1.00                           | 1.22   | 1.32                        | 1.43   |
| Total fat <sup>b</sup> , g/d                 | 83.37                           | 12.08    | 83.49                          | 11.85  | 84.34                       | 12.55  |
| Total saturated fat <sup>b</sup> , g/d       | 25.47                           | 4.80     | 25.75                          | 4.41   | 26.12                       | 4.96   |
| Total monounsaturated fat <sup>b</sup> , g/d | 32.42                           | 5.24     | 32.39                          | 5.17   | 32.51                       | 5.37   |
| Total polyunsaturated fat <sup>b</sup> , g/d | 18.64                           | 3.28     | 18.51                          | 3.21   | 18.83                       | 4.01   |
| Total trans-fat <sup>b</sup> , g/d           | 3.22                            | 1.12     | 3.35                           | 0.85   | 3.20                        | 1.11   |
| Total marine omega-3 <sup>b</sup> , mg/d     | 134.91                          | 114.11   | 127.90                         | 76.17  | 122.92                      | 112.66 |
| Total energy, kcal/d                         | 2,048.49                        | 1,011.85 | 1,803.04                       | 982.18 | 2,044.54                    | 959.67 |

<sup>a</sup> Women who withdrew from the study prior to the 20 month follow-up visit were excluded from the analysis. Women who withdrew after completing their first follow-up visit were right-censored from the analysis.

<sup>b</sup> Energy-adjusted using the nutrient residual method.



Web Table 2. Associations of Dietary Fat Intake with UL Risk in SELF, 2010-2018 (n=1,171).

| Dietary Fat                                  | Energy-Adjusted Quartiles of Fat Intake |          |                   |              |                   |              |           |              | P trend |
|----------------------------------------------|-----------------------------------------|----------|-------------------|--------------|-------------------|--------------|-----------|--------------|---------|
|                                              | 1                                       | 2        | 3                 | 4            |                   |              |           |              |         |
| <b>Total fat, g/d</b>                        | <76.96                                  |          | 76.96-84.07       |              | 84.08-91.15       |              | ≥91.16    |              |         |
| No. of Cases                                 | 67                                      |          | 68                |              | 67                |              | 75        |              |         |
| HR (95% CI) <sup>a</sup>                     | 1.00                                    | Referent | 0.88              | (0.62, 1.25) | 0.80              | (0.56, 1.15) | 1.07      | (0.77, 1.50) | 0.77    |
| HR (95% CI) <sup>b</sup>                     | 1.00                                    | Referent | 0.89              | (0.62, 1.27) | 0.80              | (0.56, 1.14) | 1.08      | (0.76, 1.52) | 0.78    |
| <b>Total saturated fat, g/d</b>              | <23.18                                  |          | 23.18-25.71       |              | 25.72-28.69       |              | ≥28.70    |              |         |
| No. of Cases                                 | 66                                      |          | 71                |              | 74                |              | 66        |              |         |
| HR (95% CI) <sup>a</sup>                     | 1.00                                    | Referent | 0.94              | (0.66, 1.33) | 1.00              | (0.71, 1.41) | 0.93      | (0.65, 1.31) | 0.74    |
| HR (95% CI) <sup>b</sup>                     | 1.00                                    | Referent | 0.92              | (0.65, 1.32) | 1.05              | (0.74, 1.48) | 0.97      | (0.67, 1.38) | 0.98    |
| <b>Fatty acid 4:0 (butyric acid), mg/d</b>   | <419.92                                 |          | 419.92-515.31     |              | 515.32-645.77     |              | ≥645.78   |              |         |
| No. of Cases                                 | 64                                      |          | 67                |              | 74                |              | 72        |              |         |
| HR (95% CI) <sup>a</sup>                     | 1.00                                    | Referent | 0.95              | (0.67, 1.36) | 1.16              | (0.82, 1.64) | 1.10      | (0.78, 1.55) | 0.44    |
| HR (95% CI) <sup>b</sup>                     | 1.00                                    | Referent | 0.95              | (0.66, 1.36) | 1.17              | (0.82, 1.66) | 1.11      | (0.78, 1.57) | 0.43    |
| <b>Fatty acid 6:0 (caproic acid), mg/d</b>   | <225.85                                 |          | 225.85-276.17     |              | 276.18-349.01     |              | ≥349.02   |              |         |
| No. of Cases                                 | 67                                      |          | 64                |              | 74                |              | 72        |              |         |
| HR (95% CI) <sup>a</sup>                     | 1.00                                    | Referent | 0.88              | (0.61, 1.26) | 1.12              | (0.79, 1.57) | 1.04      | (0.74, 1.46) | 0.57    |
| HR (95% CI) <sup>b</sup>                     | 1.00                                    | Referent | 0.86              | (0.60, 1.24) | 1.15              | (0.81, 1.63) | 1.04      | (0.74, 1.48) | 0.53    |
| <b>Fatty acid 8:0 (caprylic acid), mg/d</b>  | <174.64                                 |          | 174.64-211.02     |              | 211.03-248.62     |              | ≥248.63   |              |         |
| No. of Cases                                 | 69                                      |          | 66                |              | 73                |              | 69        |              |         |
| HR (95% CI) <sup>a</sup>                     | 1.00                                    | Referent | 0.89              | (0.62, 1.26) | 1.02              | (0.72, 1.44) | 0.96      | (0.68, 1.35) | 0.99    |
| HR (95% CI) <sup>b</sup>                     | 1.00                                    | Referent | 0.83              | (0.58, 1.18) | 1.01              | (0.71, 1.44) | 0.92      | (0.65, 1.31) | 0.91    |
| <b>Fatty acid 10:0 (capric acid), mg/d</b>   | <334.61                                 |          | 334.61-404.56     |              | 404.57-496.48     |              | ≥496.49   |              |         |
| No. of Cases                                 | 65                                      |          | 67                |              | 73                |              | 72        |              |         |
| HR (95% CI) <sup>a</sup>                     | 1.00                                    | Referent | 0.96              | (0.67, 1.36) | 1.12              | (0.79, 1.58) | 1.07      | (0.76, 1.51) | 0.55    |
| HR (95% CI) <sup>b</sup>                     | 1.00                                    | Referent | 0.96              | (0.67, 1.38) | 1.13              | (0.79, 1.61) | 1.09      | (0.77, 1.55) | 0.52    |
| <b>Fatty acid 12:0 (lauric acid), mg/d</b>   | <517.10                                 |          | 517.10-621.12     |              | 621.13-752.10     |              | ≥752.11   |              |         |
| No. of Cases                                 | 62                                      |          | 71                |              | 86                |              | 58        |              |         |
| HR (95% CI) <sup>a</sup>                     | 1.00                                    | Referent | 1.14              | (0.79, 1.63) | 1.38              | (0.98, 1.96) | 0.92      | (0.64, 1.32) | 0.66    |
| HR (95% CI) <sup>b</sup>                     | 1.00                                    | Referent | 1.14              | (0.79, 1.65) | 1.35              | (0.95, 1.92) | 0.86      | (0.59, 1.25) | 0.41    |
| <b>Fatty acid 14:0 (myristic acid), mg/d</b> | <1,669.28                               |          | 1,669.28-1,968.36 |              | 1,968.37-2,334.26 |              | ≥2,334.27 |              |         |
| No. of Cases                                 | 61                                      |          | 75                |              | 73                |              | 68        |              |         |

|                                          |                  |          |                     |              |                     |              |               |              |      |
|------------------------------------------|------------------|----------|---------------------|--------------|---------------------|--------------|---------------|--------------|------|
| HR (95% CI) <sup>a</sup>                 | 1.00             | Referent | 1.24                | (0.87, 1.77) | 1.17                | (0.82, 1.67) | 1.13          | (0.80, 1.61) | 0.63 |
| HR (95% CI) <sup>b</sup>                 | 1.00             | Referent | 1.30                | (0.91, 1.86) | 1.24                | (0.87, 1.78) | 1.16          | (0.81, 1.66) | 0.56 |
| Fatty acid 16:0 (palmitic acid), mg/d    | <12,693.14       |          | 12,693.14-13,990.74 |              | 13,990.75-15,405.02 |              | ≥15,405.03    |              |      |
| No. of Cases                             | 68               |          | 66                  |              | 72                  |              | 71            |              |      |
| HR (95% CI) <sup>a</sup>                 | 1.00             | Referent | 0.83                | (0.59, 1.19) | 0.91                | (0.65, 1.29) | 1.01          | (0.72, 1.42) | 0.82 |
| HR (95% CI) <sup>b</sup>                 | 1.00             | Referent | 0.83                | (0.58, 1.18) | 0.96                | (0.68, 1.36) | 1.09          | (0.77, 1.54) | 0.48 |
| Fatty acid 18:0 (stearic acid), mg/d     | <5,901.01        |          | 5,901.01-6,648.18   |              | 6,648.19-7,327.46   |              | ≥7,327.47     |              |      |
| No. of Cases                             | 68               |          | 74                  |              | 67                  |              | 68            |              |      |
| HR (95% CI) <sup>a</sup>                 | 1.00             | Referent | 0.98                | (0.70, 1.38) | 0.82                | (0.57, 1.16) | 0.97          | (0.69, 1.36) | 0.68 |
| HR (95% CI) <sup>b</sup>                 | 1.00             | Referent | 0.91                | (0.64, 1.28) | 0.83                | (0.58, 1.19) | 1.06          | (0.75, 1.51) | 0.83 |
| <b>Total monounsaturated fat, g/d</b>    | <b>&lt;29.58</b> |          | <b>29.58-32.49</b>  |              | <b>32.50-35.29</b>  |              | <b>≥35.30</b> |              |      |
| No. of Cases                             | 67               |          | 70                  |              | 60                  |              | 80            |              |      |
| HR (95% CI) <sup>a</sup>                 | 1.00             | Referent | 0.92                | (0.65, 1.31) | 0.72                | (0.50, 1.03) | 1.16          | (0.83, 1.61) | 0.57 |
| HR (95% CI) <sup>b</sup>                 | 1.00             | Referent | 0.90                | (0.63, 1.29) | 0.72                | (0.50, 1.04) | 1.17          | (0.83, 1.64) | 0.53 |
| Fatty acid 16:1 (palmitoleic acid), mg/d | <969.73          |          | 969.73-1,150.84     |              | 1,150.85-1,317.09   |              | ≥1,317.10     |              |      |
| No. of Cases                             | 56               |          | 80                  |              | 67                  |              | 74            |              |      |
| HR (95% CI) <sup>a</sup>                 | 1.00             | Referent | 1.39                | (0.97, 1.98) | 1.09                | (0.75, 1.59) | 1.36          | (0.96, 1.93) | 0.21 |
| HR (95% CI) <sup>b</sup>                 | 1.00             | Referent | 1.29                | (0.90, 1.86) | 1.11                | (0.76, 1.63) | 1.42          | (0.99, 2.04) | 0.10 |
| Fatty acid 18:1 (oleic acid), mg/d       | <26,718.74       |          | 26,718.74-29,527.19 |              | 29,527.20-32,228.72 |              | ≥32,228.73    |              |      |
| No. of Cases                             | 65               |          | 70                  |              | 60                  |              | 82            |              |      |
| HR (95% CI) <sup>a</sup>                 | 1.00             | Referent | 0.93                | (0.65, 1.32) | 0.74                | (0.51, 1.07) | 1.22          | (0.88, 1.70) | 0.36 |
| HR (95% CI) <sup>b</sup>                 | 1.00             | Referent | 0.89                | (0.62, 1.27) | 0.70                | (0.49, 1.02) | 1.23          | (0.88, 1.72) | 0.33 |
| Fatty acid 20:1 (gadoleic acid), mg/d    | <243.85          |          | 243.85-281.97       |              | 281.98-317.29       |              | ≥317.30       |              |      |
| No. of Cases                             | 60               |          | 72                  |              | 79                  |              | 66            |              |      |
| HR (95% CI) <sup>a</sup>                 | 1.00             | Referent | 1.11                | (0.78, 1.59) | 1.24                | (0.87, 1.76) | 1.11          | (0.78, 1.58) | 0.52 |
| HR (95% CI) <sup>b</sup>                 | 1.00             | Referent | 1.13                | (0.79, 1.62) | 1.27                | (0.89, 1.81) | 1.12          | (0.78, 1.60) | 0.49 |
| Fatty acid 22:1 (erucic acid), mg/d      | <23.20           |          | 23.20-34.01         |              | 34.02-49.30         |              | ≥49.31        |              |      |
| No. of Cases                             | 60               |          | 72                  |              | 75                  |              | 70            |              |      |
| HR (95% CI) <sup>a</sup>                 | 1.00             | Referent | 1.05                | (0.72, 1.52) | 1.15                | (0.78, 1.68) | 1.21          | (0.85, 1.72) | 0.27 |
| HR (95% CI) <sup>b</sup>                 | 1.00             | Referent | 1.18                | (0.80, 1.73) | 1.19                | (0.80, 1.77) | 1.30          | (0.90, 1.88) | 0.21 |

|                                               |               |                     |                     |                   |  |  |  |       |
|-----------------------------------------------|---------------|---------------------|---------------------|-------------------|--|--|--|-------|
| <b>Total Polyunsaturated fat, g/d</b>         | <16.57        | 16.57-18.56         | 18.57-20.80         | ≥20.81            |  |  |  |       |
| No. of Cases                                  | 61            | 71                  | 79                  | 66                |  |  |  |       |
| HR (95% CI) <sup>a</sup>                      | 1.00 Referent | 1.05 (0.74, 1.50)   | 1.20 (0.85, 1.71)   | 0.97 (0.68, 1.38) |  |  |  | 0.92  |
| HR (95% CI) <sup>b</sup>                      | 1.00 Referent | 1.10 (0.76, 1.58)   | 1.28 (0.89, 1.83)   | 0.91 (0.64, 1.31) |  |  |  | 0.67  |
| <i>Omega-3 fatty acids</i>                    |               |                     |                     |                   |  |  |  |       |
| Fatty acid 18:3 (α-linolenic acid), mg/d      | <1,379.76     | 1,379.76-1,590.68   | 1,590.69-1,863.07   | ≥1,863.08         |  |  |  |       |
| No. of Cases                                  | 66            | 81                  | 67                  | 63                |  |  |  |       |
| HR (95% CI) <sup>a</sup>                      | 1.00 Referent | 1.07 (0.76, 1.50)   | 0.83 (0.58, 1.18)   | 0.82 (0.58, 1.17) |  |  |  | 0.14  |
| HR (95% CI) <sup>b</sup>                      | 1.00 Referent | 1.10 (0.78, 1.56)   | 0.84 (0.59, 1.21)   | 0.82 (0.58, 1.18) |  |  |  | 0.14  |
| Fatty acid 20:5 (eicosapentaenoic acid), mg/d | <19.70        | 19.70-32.04         | 32.05-48.24         | ≥48.25            |  |  |  |       |
| No. of Cases                                  | 61            | 59                  | 78                  | 79                |  |  |  |       |
| HR (95% CI) <sup>a</sup>                      | 1.00 Referent | 0.82 (0.56, 1.21)   | 1.10 (0.76, 1.60)   | 1.25 (0.88, 1.77) |  |  |  | 0.05  |
| HR (95% CI) <sup>b</sup>                      | 1.00 Referent | 0.83 (0.56, 1.23)   | 1.14 (0.78, 1.66)   | 1.25 (0.87, 1.81) |  |  |  | 0.06  |
| Fatty acid 22:5 (docosapentaenoic acid), mg/d | <8.01         | 8.01-12.01          | 12.02-18.04         | ≥18.05            |  |  |  |       |
| No. of Cases                                  | 61            | 68                  | 70                  | 78                |  |  |  |       |
| HR (95% CI) <sup>a</sup>                      | 1.00 Referent | 0.97 (0.67, 1.41)   | 1.01 (0.70, 1.47)   | 1.25 (0.89, 1.77) |  |  |  | 0.12  |
| HR (95% CI) <sup>b</sup>                      | 1.00 Referent | 1.01 (0.69, 1.47)   | 1.00 (0.68, 1.47)   | 1.22 (0.85, 1.75) |  |  |  | 0.21  |
| Fatty acid 22:6 (docosahexaenoic acid), mg/d  | <40.60        | 40.60-58.11         | 58.12-80.38         | ≥80.39            |  |  |  |       |
| No. of Cases                                  | 56            | 67                  | 68                  | 86                |  |  |  |       |
| HR (95% CI) <sup>a</sup>                      | 1.00 Referent | 1.06 (0.72, 1.54)   | 1.09 (0.74, 1.59)   | 1.52 (1.07, 2.15) |  |  |  | <0.01 |
| HR (95% CI) <sup>b</sup>                      | 1.00 Referent | 1.04 (0.71, 1.52)   | 1.12 (0.76, 1.64)   | 1.49 (1.04, 2.14) |  |  |  | 0.01  |
| Total marine omega-3, mg/d                    | <70.37        | 70.37-102.13        | 102.14-146.36       | ≥146.37           |  |  |  |       |
| No. of Cases                                  | 59            | 61                  | 76                  | 81                |  |  |  |       |
| HR (95% CI) <sup>a</sup>                      | 1.00 Referent | 0.90 (0.61, 1.31)   | 1.12 (0.78, 1.62)   | 1.37 (0.96, 1.93) |  |  |  | 0.02  |
| HR (95% CI) <sup>b</sup>                      | 1.00 Referent | 0.87 (0.59, 1.29)   | 1.14 (0.79, 1.66)   | 1.35 (0.94, 1.93) |  |  |  | 0.03  |
| <i>Omega-6 fatty acids</i>                    |               |                     |                     |                   |  |  |  |       |
| Fatty acid 18:2 (linoleic acid), mg/d         | <13,963.96    | 13,963.96-15,689.54 | 15,689.55-17,615.96 | ≥17,615.97        |  |  |  |       |
| No. of Cases                                  | 61            | 72                  | 75                  | 69                |  |  |  |       |

|                                                                 |            |          |                     |              |                     |              |            |              |      |
|-----------------------------------------------------------------|------------|----------|---------------------|--------------|---------------------|--------------|------------|--------------|------|
| HR (95% CI) <sup>a</sup>                                        | 1.00       | Referent | 1.12                | (0.78, 1.59) | 1.10                | (0.77, 1.57) | 1.05       | (0.74, 1.48) | 0.85 |
| HR (95% CI) <sup>b</sup>                                        | 1.00       | Referent | 1.18                | (0.82, 1.70) | 1.16                | (0.80, 1.67) | 0.99       | (0.70, 1.42) | 0.86 |
| Fatty acid 20:4 (arachidonic acid), mg/d                        | <100.58    |          | 100.58-129.79       |              | 129.80-164.01       |              | ≥164.02    |              |      |
| No. of Cases                                                    | 64         |          | 71                  |              | 73                  |              | 69         |              |      |
| HR (95% CI) <sup>a</sup>                                        | 1.00       | Referent | 1.03                | (0.72, 1.47) | 1.03                | (0.72, 1.47) | 1.13       | (0.80, 1.60) | 0.48 |
| HR (95% CI) <sup>b</sup>                                        | 1.00       | Referent | 1.01                | (0.70, 1.44) | 1.10                | (0.76, 1.58) | 1.24       | (0.87, 1.75) | 0.19 |
| Total omega-6, mg/d                                             | <14,089.06 |          | 14,089.06-15,841.71 |              | 15,841.72-17,759.58 |              | ≥17,759.59 |              |      |
| No. of Cases                                                    | 63         |          | 68                  |              | 74                  |              | 72         |              |      |
| HR (95% CI) <sup>a</sup>                                        | 1.00       | Referent | 1.01                | (0.71, 1.44) | 1.03                | (0.73, 1.47) | 1.07       | (0.76, 1.50) | 0.69 |
| HR (95% CI) <sup>b</sup>                                        | 1.00       | Referent | 1.04                | (0.73, 1.50) | 1.07                | (0.75, 1.54) | 1.00       | (0.71, 1.43) | 0.99 |
| Ratio of total omega-6 to total marine omega-3                  | <98.94     |          | 98.94-146.13        |              | 146.14-205.20       |              | ≥205.20    |              |      |
| No. of Cases                                                    | 69         |          | 86                  |              | 62                  |              | 60         |              |      |
| HR (95% CI) <sup>a</sup>                                        | 1.00       | Referent | 1.13                | (0.80, 1.59) | 0.75                | (0.42, 1.08) | 0.81       | (0.57, 1.15) | 0.09 |
| HR (95% CI) <sup>b</sup>                                        | 1.00       | Referent | 1.09                | (0.77, 1.56) | 0.78                | (0.53, 1.13) | 0.80       | (0.56, 1.15) | 0.10 |
| <b>Total trans-fat, g/d</b>                                     | <2.57      |          | 2.57-3.12           |              | 3.13-3.73           |              | ≥3.74      |              |      |
| No. of Cases                                                    | 73         |          | 64                  |              | 75                  |              | 65         |              |      |
| HR (95% CI) <sup>a</sup>                                        | 1.00       | Referent | 0.74                | (0.52, 1.06) | 0.90                | (0.64, 1.26) | 0.83       | (0.59, 1.17) | 0.49 |
| HR (95% CI) <sup>b</sup>                                        | 1.00       | Referent | 0.75                | (0.52, 1.07) | 0.91                | (0.64, 1.30) | 0.83       | (0.59, 1.18) | 0.53 |
| <i>trans</i> Fatty acid 16:1 (trans hexadecenoic acid), mg/d    | <26.03     |          | 26.03-32.44         |              | 32.45-38.97         |              | ≥38.98     |              |      |
| No. of Cases                                                    | 64         |          | 63                  |              | 83                  |              | 67         |              |      |
| HR (95% CI) <sup>a</sup>                                        | 1.00       | Referent | 0.86                | (0.59, 1.23) | 1.16                | (0.82, 1.64) | 0.97       | (0.69, 1.38) | 0.79 |
| HR (95% CI) <sup>b</sup>                                        | 1.00       | Referent | 0.84                | (0.58, 1.22) | 1.21                | (0.85, 1.74) | 1.02       | (0.71, 1.46) | 0.55 |
| <i>trans</i> Fatty acid 18:1 (trans octadecenoic acid), mg/d    | <4.89      |          | 4.89-12.48          |              | 12.49-20.12         |              | ≥20.13     |              |      |
| No. of Cases                                                    | 64         |          | 74                  |              | 71                  |              | 68         |              |      |
| HR (95% CI) <sup>a</sup>                                        | 1.00       | Referent | 1.05                | (0.73, 0.51) | 0.92                | (0.62, 1.37) | 0.96       | (0.67, 1.39) | 0.75 |
| HR (95% CI) <sup>b</sup>                                        | 1.00       | Referent | 1.10                | (0.76, 1.60) | 0.95                | (0.63, 1.44) | 1.01       | (0.69, 1.47) | 0.89 |
| <i>trans</i> Fatty acid 18:2 (trans octadecadienoic acid), mg/d | <138.47    |          | 138.47-163.99       |              | 164.00-186.16       |              | ≥186.17    |              |      |

| No. of Cases             | 69   |          | 58   |              | 72   |              | 78   |              |      |
|--------------------------|------|----------|------|--------------|------|--------------|------|--------------|------|
| HR (95% CI) <sup>a</sup> | 1.00 | Referent | 0.74 | (0.51, 1.06) | 0.95 | (0.67, 1.34) | 1.09 | (0.79, 1.52) | 0.36 |
| HR (95% CI) <sup>b</sup> | 1.00 | Referent | 0.71 | (0.49, 1.02) | 0.92 | (0.64, 1.31) | 1.10 | (0.78, 1.55) | 0.33 |

Abbreviations: CI, confidence interval; HR, hazard ratio

<sup>a</sup> Adjusted for age and total energy

<sup>b</sup> Adjusted for age, education, income, body mass index, age at menarche, parity, age at first birth, years since last birth, oral contraceptive use, progestin-only injectable contraceptive use, alcohol intake, smoking, history of hypertension, and total energy.
